# Supplementary material for: Vinyl-monomer with lysine side chains for preparing copolymer surfaces with fibrinolytic activity
Source: Royal Society of Chemistry journal article supplement (doi:10.1039/c2py20944f), 2012-12-07
Supplement: c2py20944f.pdf [file c2py20944f.pdf]

Supporting Information

**Vinyl-monomer with lysine side chains for preparing copolymer surfaces with fibrinolytic activity**

Zengchao Tang, Dan Li, Xiaoli Liu, Zhaoqiang Wu\*, Wei Liu, John L. Brash and Hong Chen\*

Department of Polymer Science and Engineering, College of Chemistry, Chemical Engineering and Materials Science, Soochow University, 199 Renai Rd., Suzhou 215123, Jiangsu, PR China

\*To whom correspondence should be addressed. E-mail: wzqwhu@suda.edu.cn (Z. Wu), chenh@suda.edu.cn (H. Chen). Fax: +86-512-65880583; Tel: +86-512-65880827;

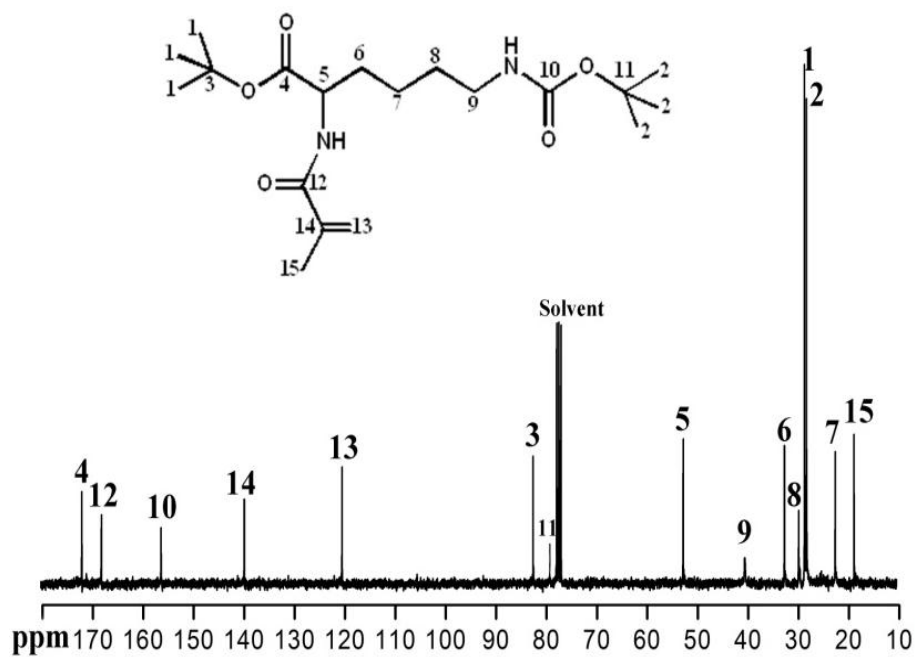

Figure S1. <sup>13</sup>C NMR spectrum of Lys(P) in CDCl<sub>3</sub>

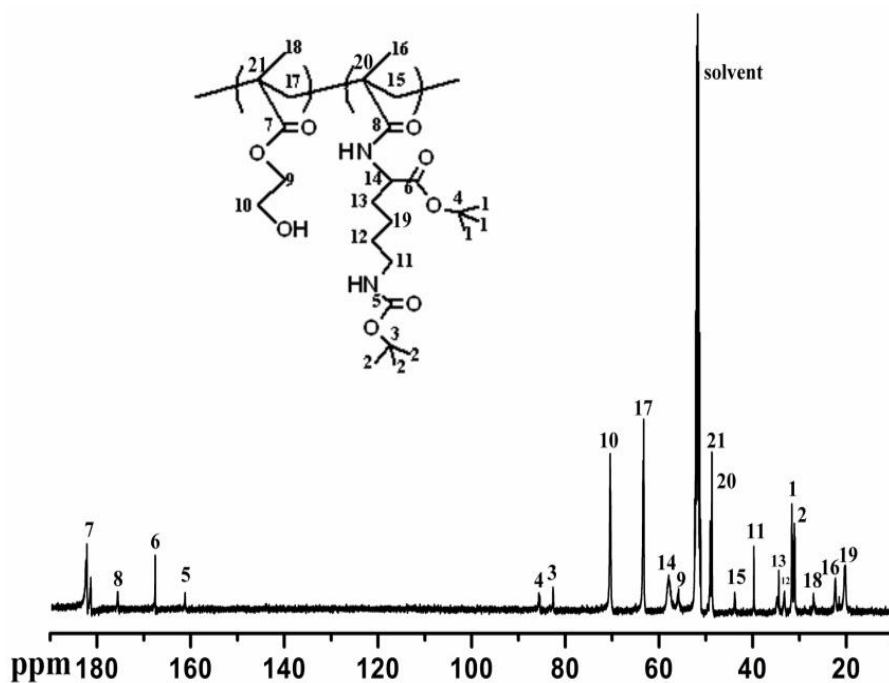

Figure S2. <sup>13</sup>C NMR spectrum of P(HEMA/Lys(P)) in methanol-*d*<sub>4</sub>

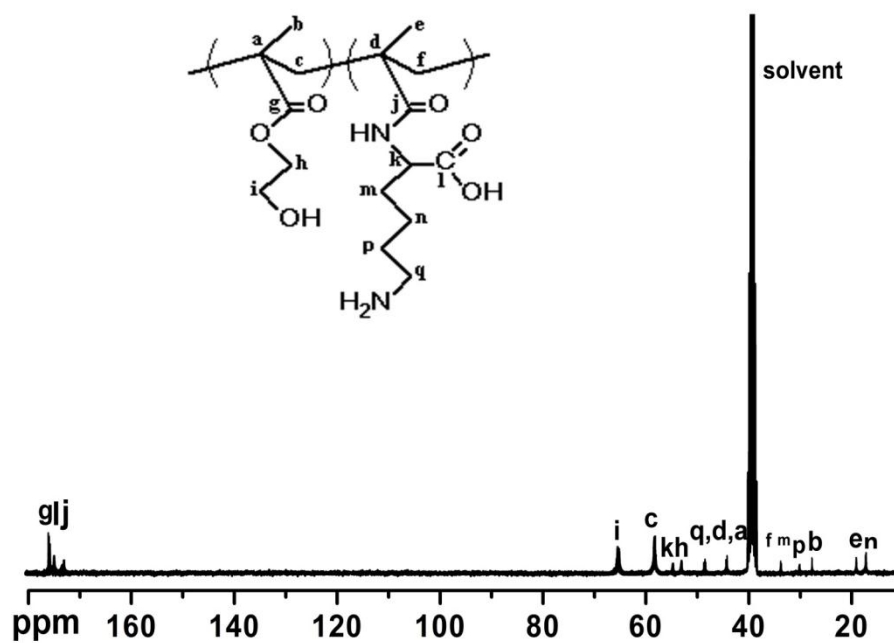

Figure S3.  $^{13}\text{C}$  NMR spectrum of P(HEMA/Lys) in  $\text{DMSO-}d_6$

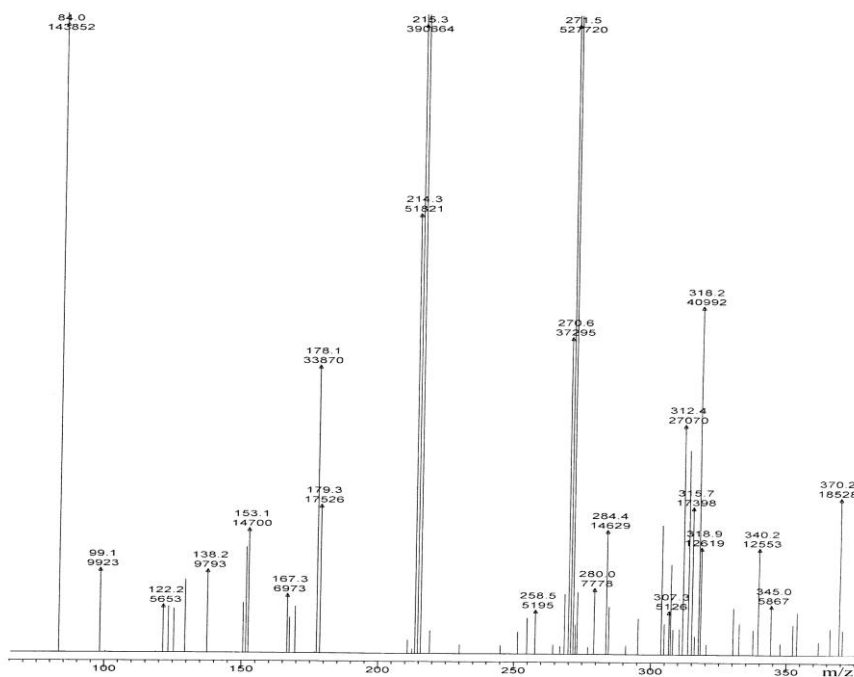

Figure S4. MS spectrum of the monomer Lys(P)
